# Supplementary material for: Diabetic Ketoacidosis Severity at Diagnosis and Glycaemic Control in the First Year of Childhood Onset Type 1 Diabetes—A Longitudinal Cohort Study
Source: Int J Environ Res Public Health. 2017 Dec 25;15(1):26. doi: 10.3390/ijerph15010026 (PMC5800126; doi:10.3390/ijerph15010026)
Supplement: Supplementary file 1 [file ijerph-15-00026-s001.pdf]

# Supplemental

**Table S1.** Comparison of characteristics between the study population included in the analysis (N = 364) and those excluded because of missing data on pH (DKA:) at diagnosis (N = 126).

| Characteristic           | Study Population<br>included in Analysis<br>(N = 364) | Subjects excluded<br>(N = 126) | <i>p</i> -value * |
|--------------------------|-------------------------------------------------------|--------------------------------|-------------------|
| Age at diagnosis (years) | 8.8                                                   | 9.1                            | 0.5               |
| HbA1c (mmol/mol)         | 68.5                                                  | 68.5                           | 0.9               |
| Ethnicity (%)            |                                                       |                                |                   |
| White                    | 36                                                    | 39                             | 0.4               |
| Mixed-ethnicity          | 10                                                    | 6                              | -                 |
| Black                    | 23                                                    | 18                             | -                 |
| Asian                    | 32                                                    | 36                             | -                 |
| Sex                      |                                                       |                                | -                 |
| Males                    | 48                                                    | 55                             | 0.2               |
| Females                  | 52                                                    | 45                             | -                 |
| Clinic attended          |                                                       |                                | -                 |
| 1                        | 26                                                    | 28                             | 0.7               |
| 2                        | 26                                                    | 22                             | -                 |
| 3                        | 48                                                    | 50                             | -                 |

\* *p* values are for a test of equal means or proportions. DKA: diabetic ketoacidosis.
